# Supplementary material for: Inflammatory cell death, PANoptosis, screen identifies host factors in coronavirus innate immune response as therapeutic targets
Source: PubMed Central journal article supplement (PMC10589293; doi:10.1038/s42003-023-05414-9), 2023-10-20
Supplement: 42003_2023_5414_MOESM2_ESM.pdf [file 42003_2023_5414_MOESM2_ESM.pdf]

## **Description of Additional Supplementary Files**

**File name:** Supplementary Data 1

**Description:** The source data for graphs in the Figures and Supplementary Figures
